# Supplementary material for: Correlation of Salmonella enterica and Listeria monocytogenes in Irrigation Water to Environmental Factors, Fecal Indicators, and Bacterial Communities
Source: PubMed Central journal article supplement (PMC7820387; doi:10.3389/fmicb.2020.557289), 2021-01-08
Supplement: Data_Sheet_1.pdf [file Data_Sheet_1.pdf]

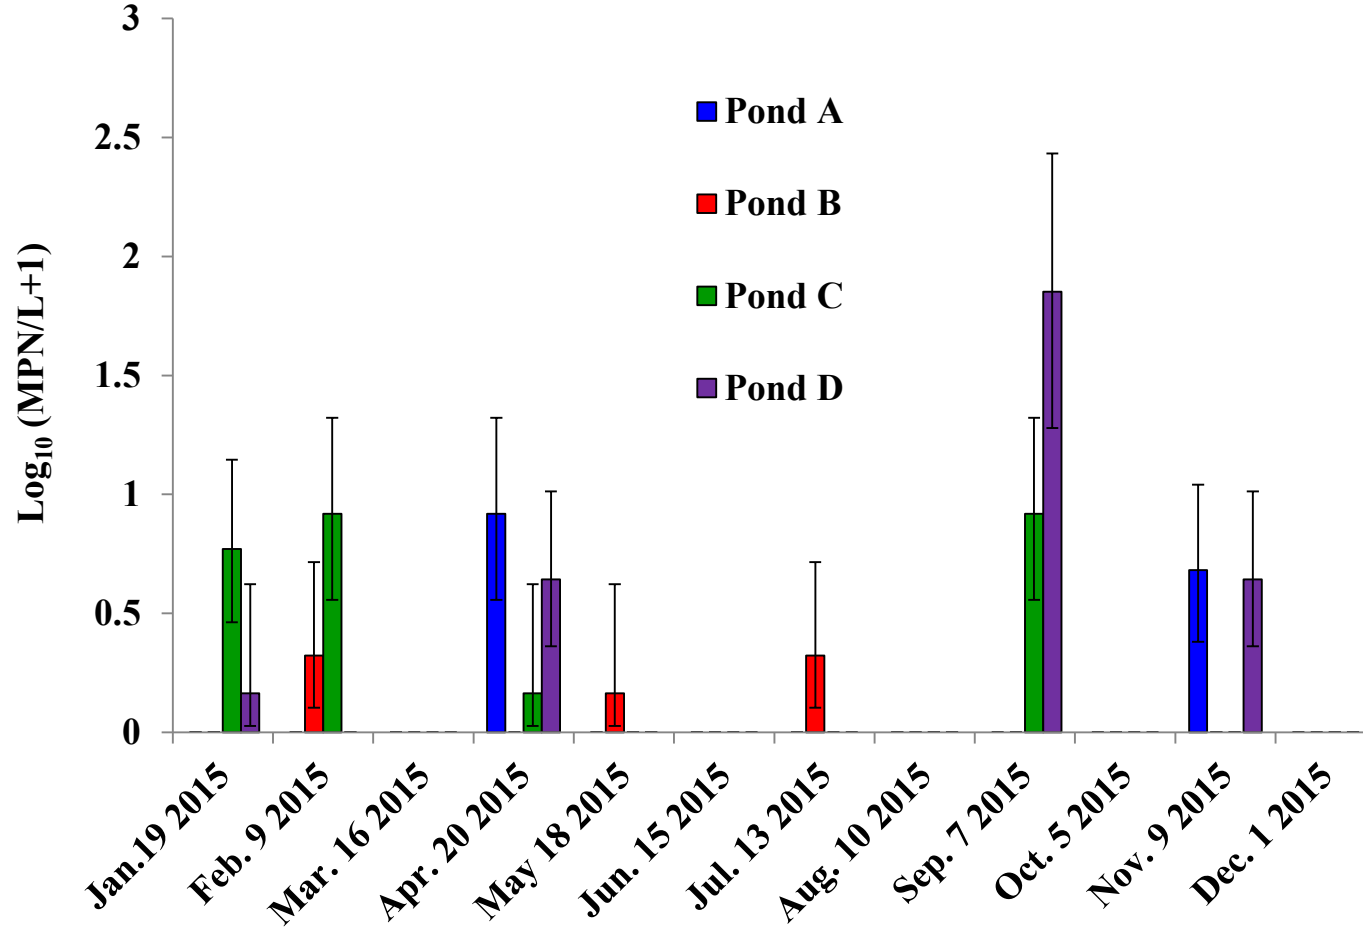

**Figure S1.** *Salmonella* MPN values of selected monthly samples (for both foodborne pathogen testing and sequencing) in the irrigation ponds of tested four farms A-D on the Eastern Shore of Virginia (ESV). Bars represent 95% confidence intervals.

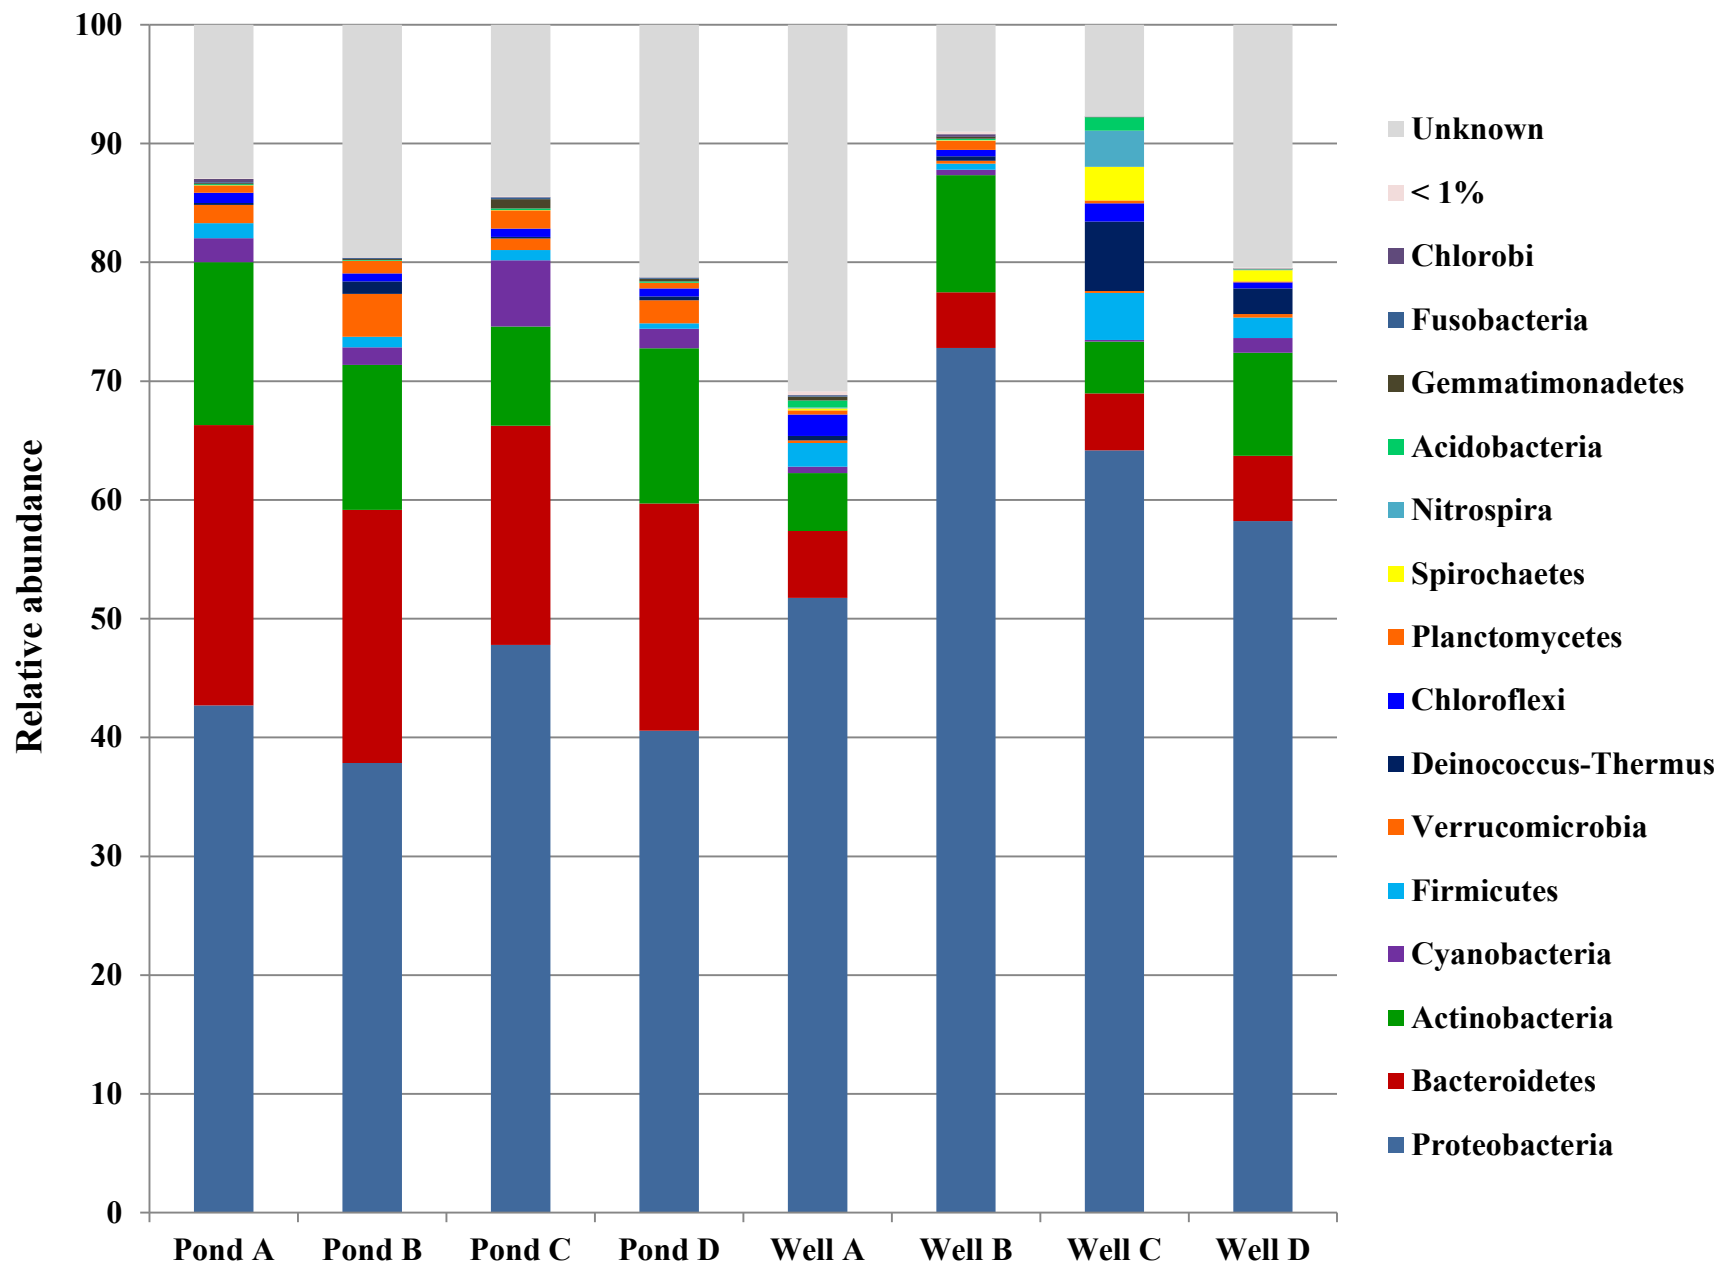

**Figure S2.** Phylum-level classification of the sequence reads of samples from the eight tested water sources. <1%, minor orders with abundance of <1%.

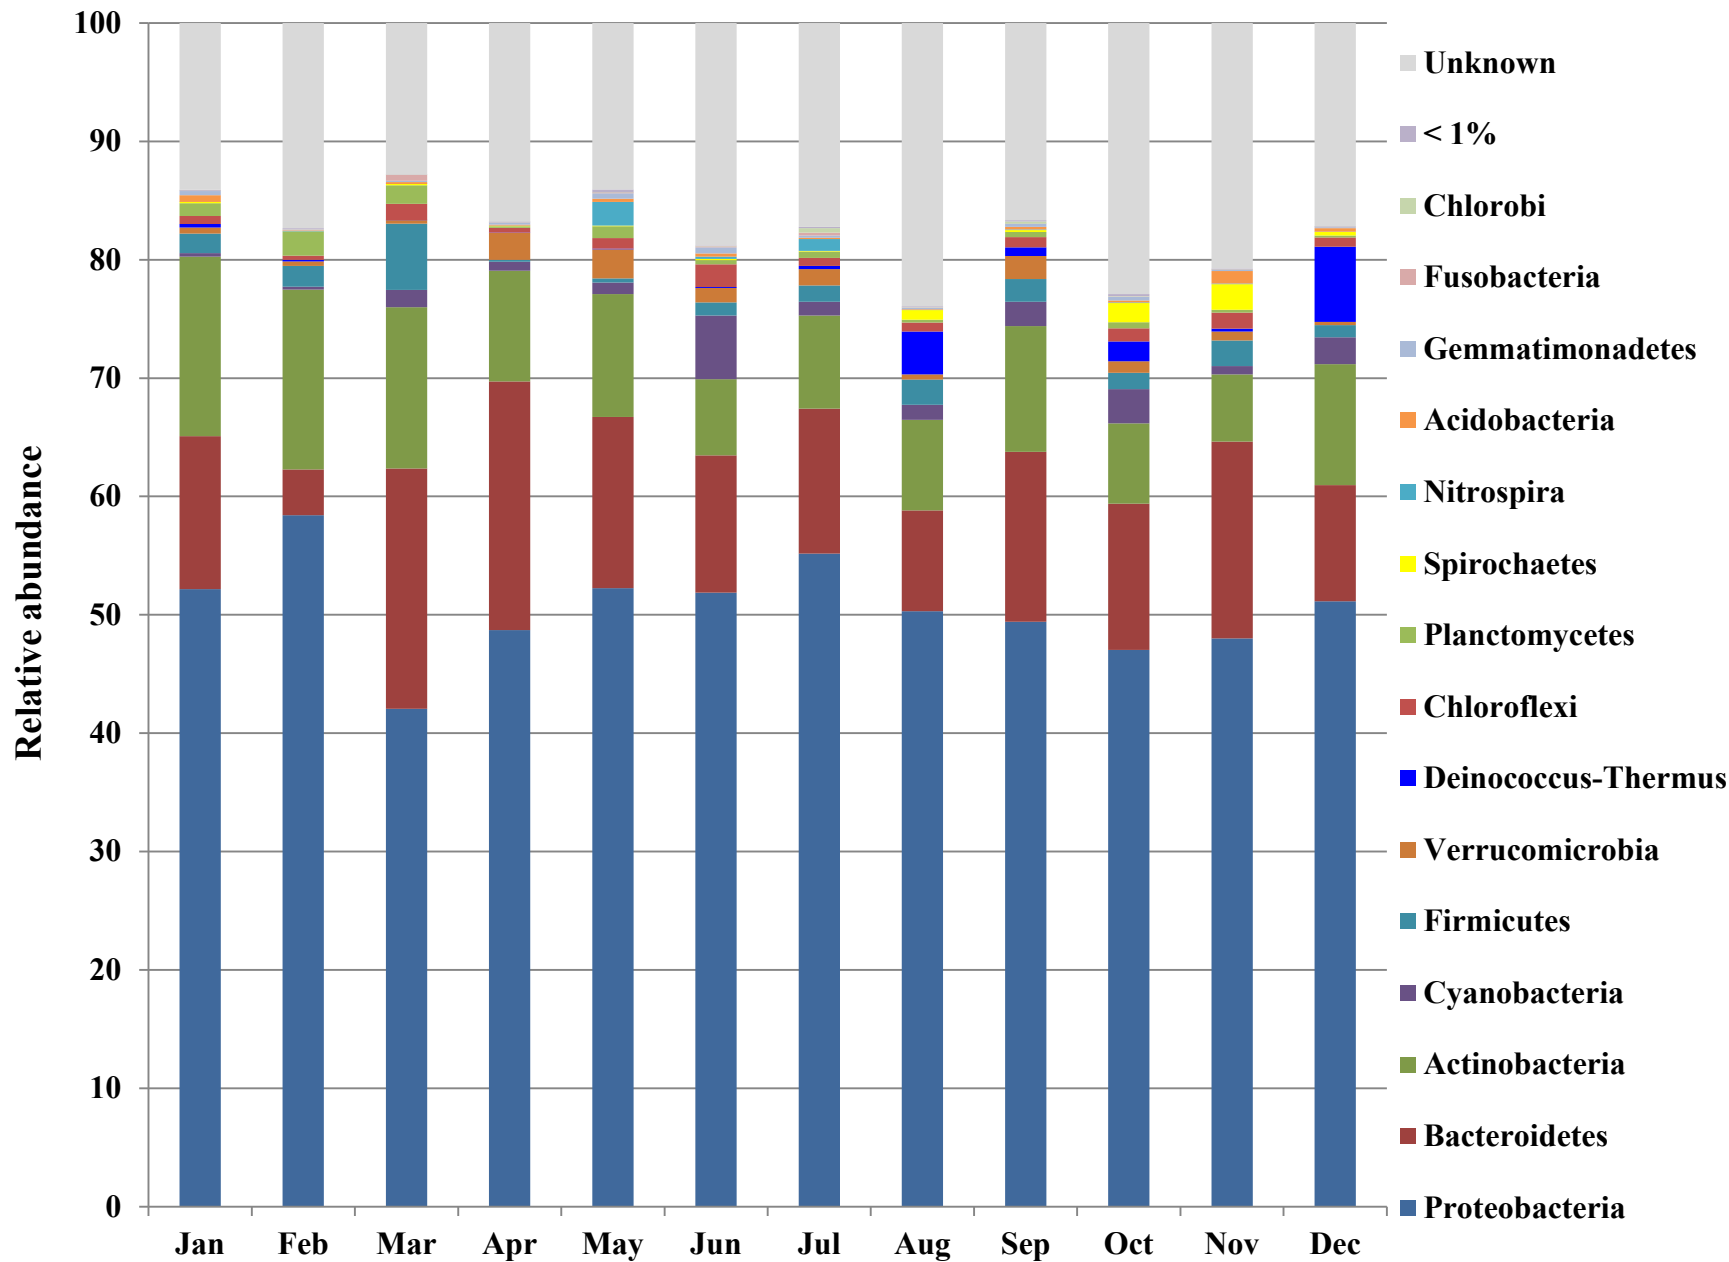

Figure S3. Dynamics of bacterial taxa (phylum) among sampling months.

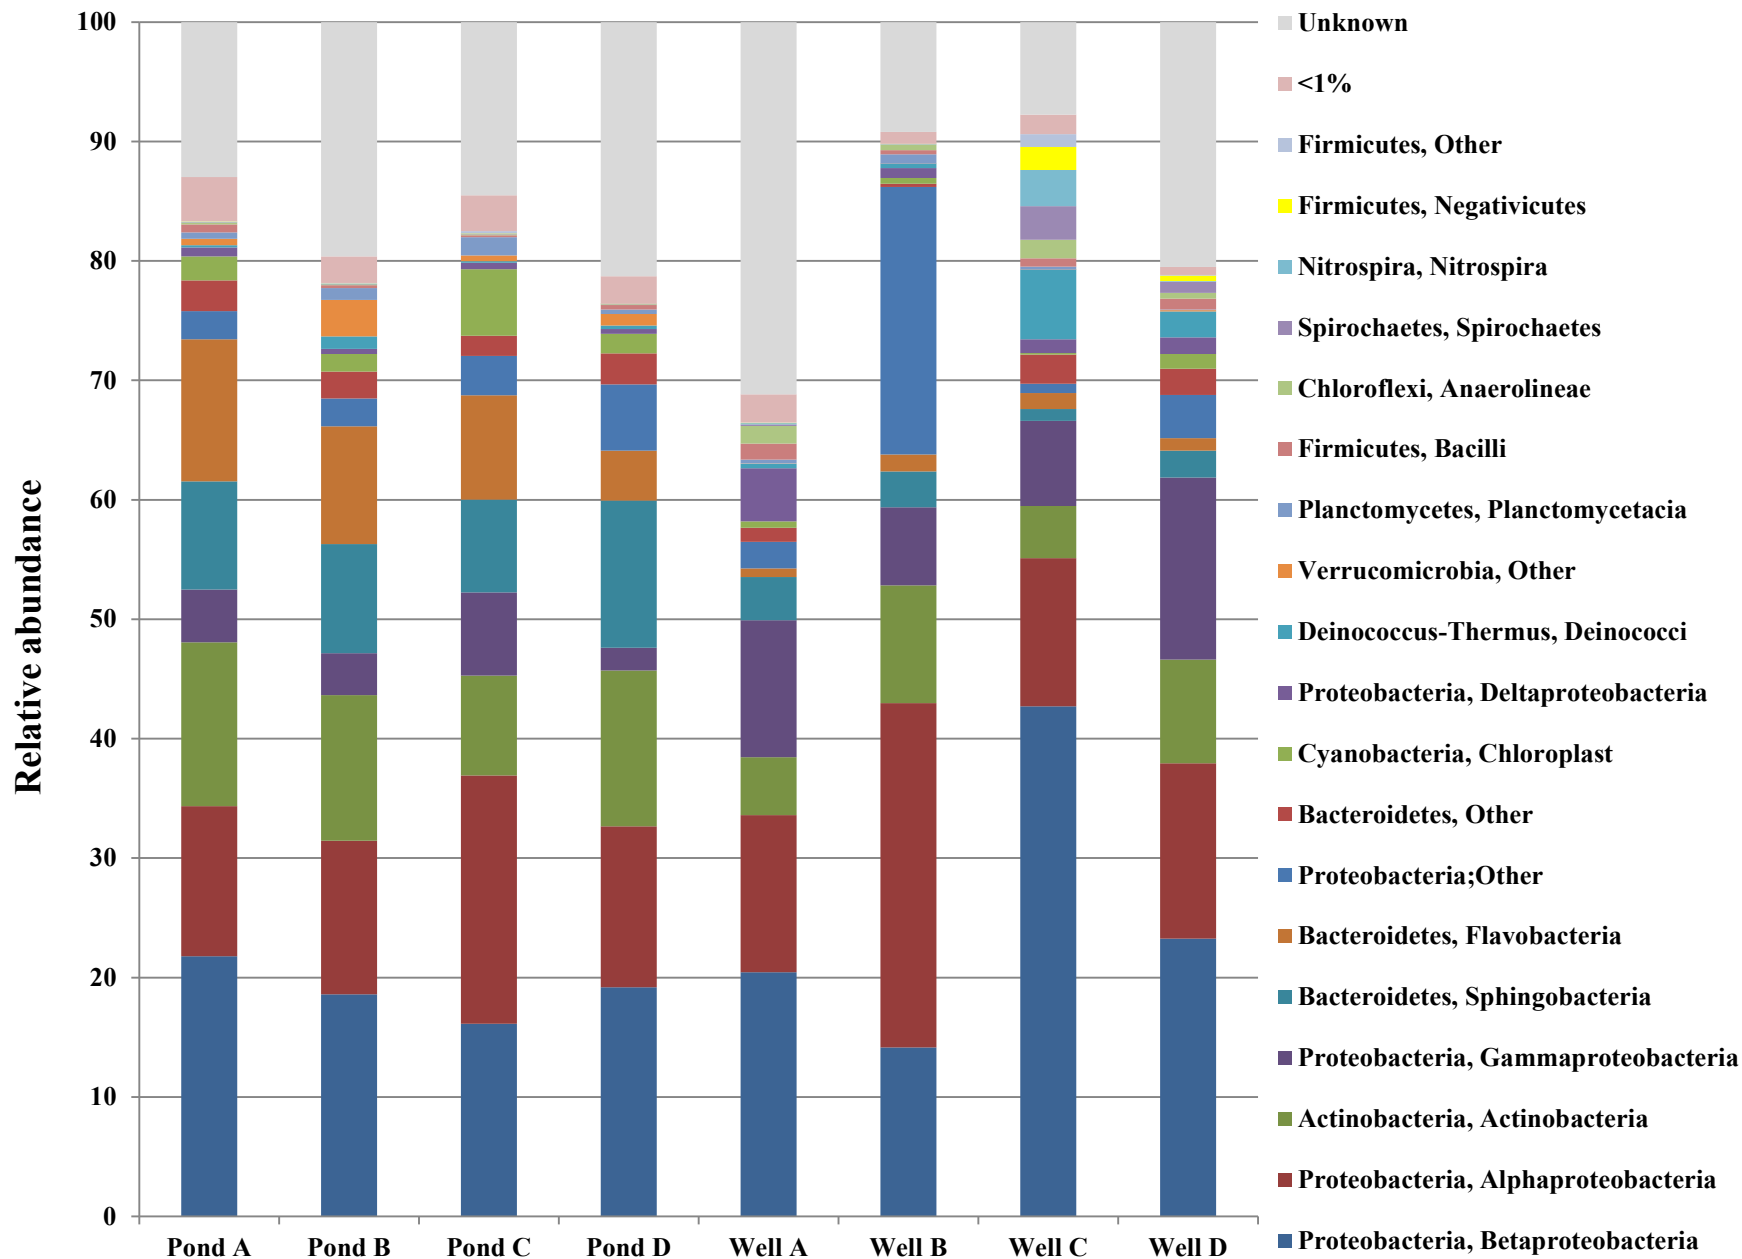

**Figure S4.** Class-level classification of the sequence reads of samples from the eight tested water sources. <1%, minor orders with abundance of <1%.

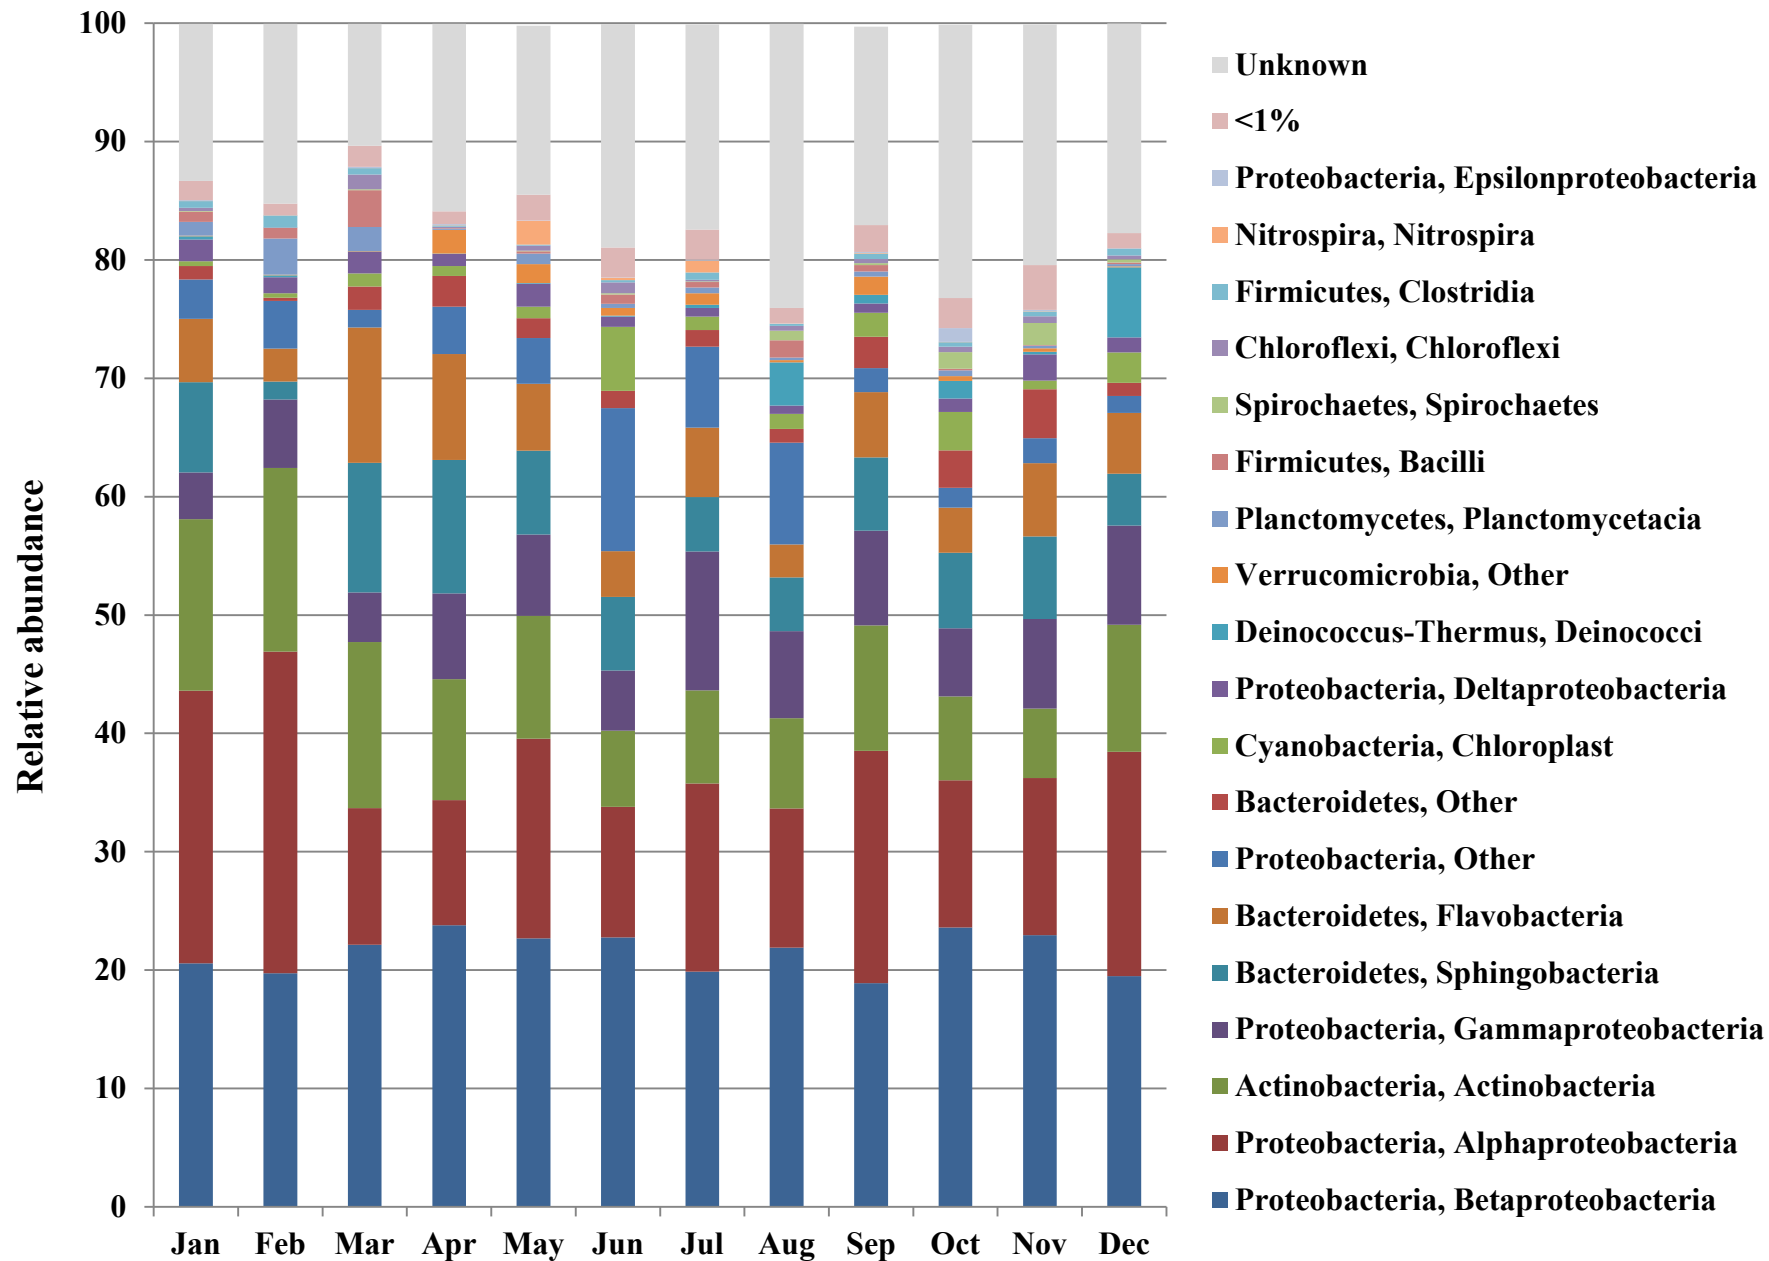

**Figure S5.** Dynamics of bacterial taxa (class) among sampling months.
